# Supplementary material
Source: PubMed Central journal article supplement (PMC2040331)

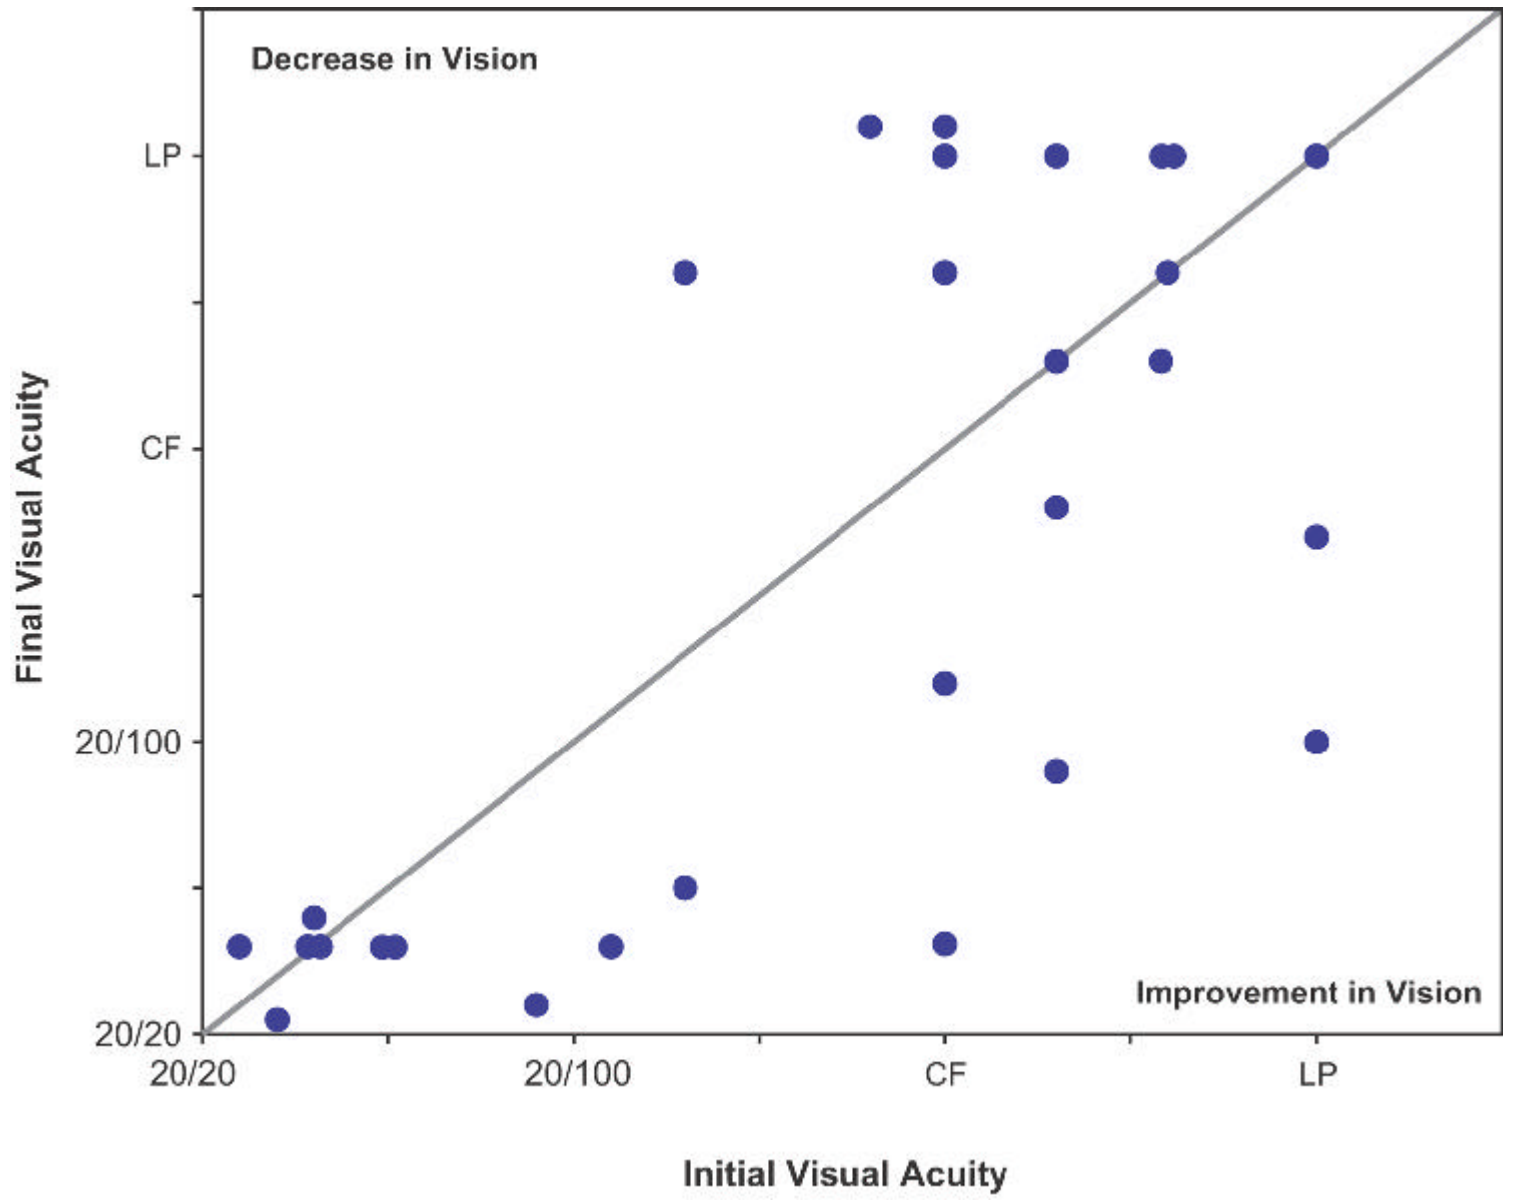

Supplement: NIHMS24366-supplement-supplement_1.pdf [file NIHMS24366-supplement-supplement_1.pdf]
